# Supplementary material
Source: HighWire-hosted journal article supplement (https://rmdopen.bmj.com/content/8/2/e002790)
Supplement: inline-supplementary-material-1 [file inline-supplementary-material-1.pdf]

**Table S1** Multivariable logistic regression analysis of clinical risk factors for RA-ILD with UIP pattern

|                              | UIP pattern<br>(n=63) | noILD<br>(n=578) | Adjusted<br>odds ratio<br>(95% CI) | Adjusted<br><i>P</i> -value |
|------------------------------|-----------------------|------------------|------------------------------------|-----------------------------|
| Age at RA diagnosis          | 53.3 ± 11.2           | 45.0 ± 13.0      | 1.05 (1.02, 1.07)                  | 4.8×10 <sup>-5</sup>        |
| Sex, female                  | 46 (73.0)             | 491 (84.9)       | 1.32 (0.49, 3.60)                  | .585                        |
| Smoking (n=638)              |                       |                  |                                    |                             |
| Never                        | 45 (71.4)             | 463 (80.5)       | 1                                  |                             |
| Ever                         | 13 (20.6)             | 56 (9.7)         | 1.55 (0.54, 4.46)                  | .412                        |
| Current                      | 5 (7.9)               | 56 (9.7)         | 0.72 (0.22, 2.36)                  | .587                        |
| RF positivity (n=638)        | 58 (92.1)             | 520 (90.4)       | 1.10 (0.41, 2.98)                  | .848                        |
| Anti-CCP antibody positivity | 61 (96.8)             | 509 (88.1)       | 3.07 (0.71, 13.15)                 | .130                        |

Values are presented as estimated means ± SD or N (%).

Abbreviations: *RA-ILD* rheumatoid arthritis associated interstitial lung disease, *UIP* usual interstitial pneumonia, *noILD* without interstitial lung disease, *CI* confidence interval, *RA* rheumatoid arthritis, *RF* rheumatoid factor, *CCP* citrullinated cyclic peptides

**Table S2** Multivariable logistic regression analysis of risk factors for RA-ILD with UIP pattern

|                              | Allelic association    |                             | Genotypic association  |                             |
|------------------------------|------------------------|-----------------------------|------------------------|-----------------------------|
|                              | Odds ratio<br>(95% CI) | Adjusted<br><i>P</i> -value | Odds ratio<br>(95% CI) | Adjusted<br><i>P</i> -value |
| Age at RA diagnosis          | 1.05 (1.03, 1.07)      | 6.3×10 <sup>-9</sup>        | 1.05 (1.03, 1.07)      | 3.3×10 <sup>-5</sup>        |
| Sex, female                  | 0.76 (0.37, 1.55)      | .449                        | 0.76 (0.28, 2.10)      | .600                        |
| Smoking (n=638)              |                        |                             |                        |                             |
| Never                        | 1                      |                             | 1                      |                             |
| Ever                         | 1.59 (0.75, 3.37)      | .224                        | 1.63 (0.56, 4.73)      | .368                        |
| Current                      | 0.72 (0.31, 1.67)      | .441                        | 0.71 (0.21, 2.39)      | .585                        |
| RF positivity (n=638)        | 1.08 (0.53, 2.18)      | .834                        | 1.05 (0.39, 2.86)      | .918                        |
| Anti-CCP antibody positivity | 3.05 (1.09, 8.53)      | .034                        | 3.03 (0.71, 12.98)     | .136                        |
| <i>MUC5B</i> rs35705950 (T)  | 4.94 (1.25, 19.53)     | .023                        | -                      | -                           |
| <i>MUC5B</i> rs35705950 (GT) | -                      | -                           | 5.12 (1.26, 20.75)     | .022                        |

Abbreviations: *RA-ILD* rheumatoid arthritis associated interstitial lung disease, *UIP* usual interstitial pneumonia, *CI* confidence interval, *RA* rheumatoid arthritis, *RF* rheumatoid factor, *CCP* citrullinated cyclic peptides, *MUC5B* mucin 5B

**Table S3** Meta-analysis association result from previously reported Japanese and present studies.

|                                   | Japan              | Korea              | Combined analysis  |
|-----------------------------------|--------------------|--------------------|--------------------|
| Number of patients, n             |                    |                    |                    |
| RA-noILD                          | 300                | 578                | 878                |
| RA-ILD                            | 182                | 105                | 287                |
| UIP                               | 60                 | 63                 | 123                |
| Other than UIP                    | 122                | 42                 | 164                |
| MAF of <i>MUC5B</i> rs35705950, % |                    |                    |                    |
| RA-noILD                          | 0.5                | 0.69               | 0.6                |
| RA-ILD                            | 1.1                | 1.43               | 1.22               |
| UIP                               | 1.7                | 2.38               | 2.0                |
| Other than UIP                    | 0.8                | 0                  | 0.61               |
| Genotypic association             |                    |                    |                    |
| RA-ILD vs. RA-noILD               |                    |                    |                    |
| Crude odds ratio (95% CI)         | 2.22 (0.49, 10.05) | 2.10 (0.55, 8.03)  | 2.15 (0.79, 5.87)  |
| <i>P</i> value                    |                    |                    | .134               |
| UIP vs. RA-noILD                  |                    |                    |                    |
| Crude odds ratio (95% CI)         | 3.41 (0.56, 20.88) | 3.56 (0.92, 13.79) | 3.51 (1.19, 10.37) |
| <i>P</i> value                    |                    |                    | .023               |
| Other than UIP vs. RA-noILD       |                    |                    |                    |
| Crude odds ratio (95% CI)         | 1.65 (0.27, 10.00) | 0.79 (0.04, 13.91) | 1.34 (0.29, 6.165) |
| <i>P</i> value                    |                    |                    | .707               |

Abbreviations: RA-noILD rheumatoid arthritis without interstitial lung disease RA-ILD rheumatoid arthritis associated interstitial lung disease, UIP usual interstitial pneumonia, MAF minor allele frequency, *MUC5B* mucin 5B, CI confidence interval
